# Supplementary material
Source: publisher figshare collection journal article supplement (https://acs.figshare.com/ndownloader/files/7622203)
Supplement: Supplementary file 1 [file 7622203]

# Supporting Information

## Molecular Modeling and Adsorption Properties of Ordered Silica Templated CMK Mesoporous Carbons

Surendra Kumar Jain<sup>1</sup>, Roland J-M. Pellenq<sup>2,3,4</sup>, Keith E. Gubbins<sup>5</sup> and Xuan Peng<sup>6\*</sup>

<sup>1</sup>Department of Chemical Engineering, SDMCET, Dharwad, India

<sup>2</sup>Department of Civil and Environmental Engineering, Massachusetts Institute of Technology, 77 Massachusetts Avenue, Cambridge, MA 02139, USA

<sup>3</sup><MSE><sup>2</sup> the MIT / CNRS / Aix-Marseille University joint laboratory, Massachusetts Institute of Technology, 77 Massachusetts Avenue, Cambridge, MA 02139, USA

<sup>4</sup>Centre Interdisciplinaire des Nanosciences de Marseille, CNRS and Aix-Marseille Université, Campus de Luminy, Marseille, 13288 Cedex 09, France

<sup>5</sup>Department of Chemical and Biomolecular Engineering, North Carolina State University, Raleigh 27695, USA

<sup>6</sup>College of Information Science and Technology, Beijing University of Chemical Technology, Beijing 100029, P. R. China

This supporting information includes

1. Schematic of simulation methodology of obtaining CMK models
2. Argon adsorption isotherms for CMK-1 models and experimental nitrogen adsorption isotherm for a CMK-1 sample
3. Isothermic heat of adsorption of CMK-1, CMK-3 and CMK-5 models
4. Framework densities of CMK models

---

\* Corresponding author. E-mail: pengxuan@mail.buct.edu.cn (X. Peng)

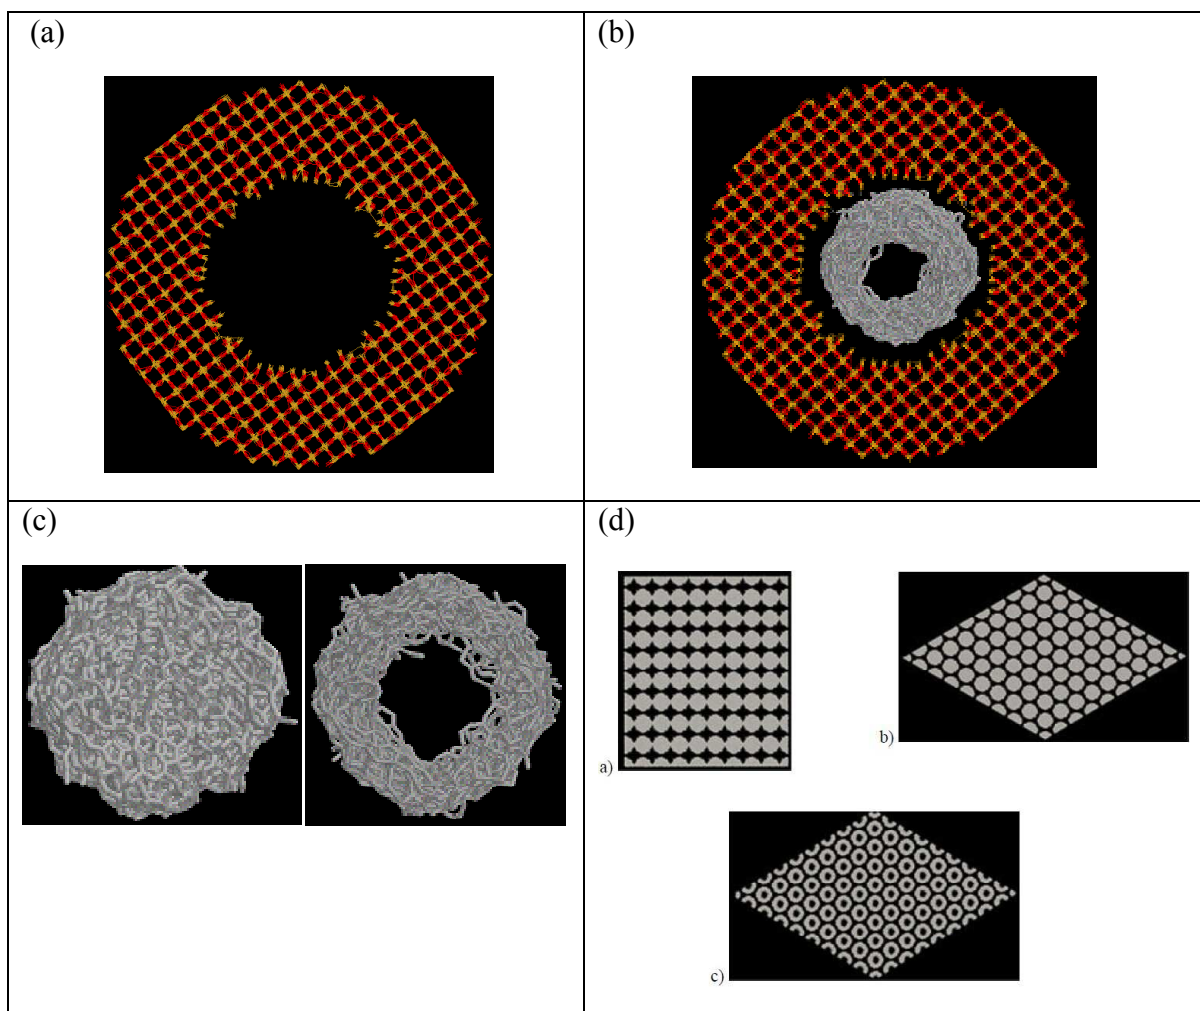

**Figure S1:** Schematic showing the simulation methodology of obtaining CMK models from MCM-41 pore (a) MCM-41 pore, (b) Carbon adsorption inside MCM-41 pore to obtain carbon rods and carbon pipes (c) Removal of silica template and relaxation of carbon pipes and rods (d) Arrangement of carbon rods in cubical lattice to get CMK-1 model, arrangement of carbon rods in hexagonal lattice to get CMK-3 model and arrangement of carbon pipes in hexagonal lattice to get CMK-5 model

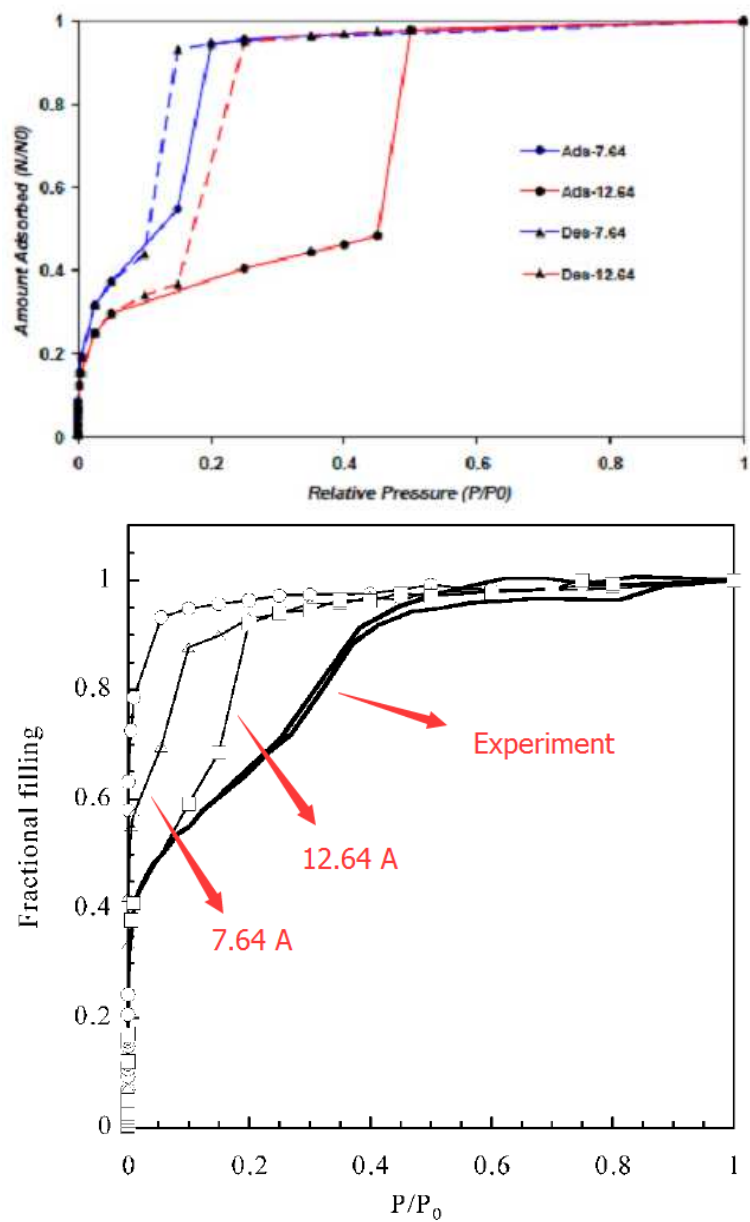

**Figure S2:** Argon adsorption isotherms at 77 K in CMK-1 models (top) and the nitrogen adsorption isotherms obtained at 77 K from RSP model *and experiment* [7] (bottom).

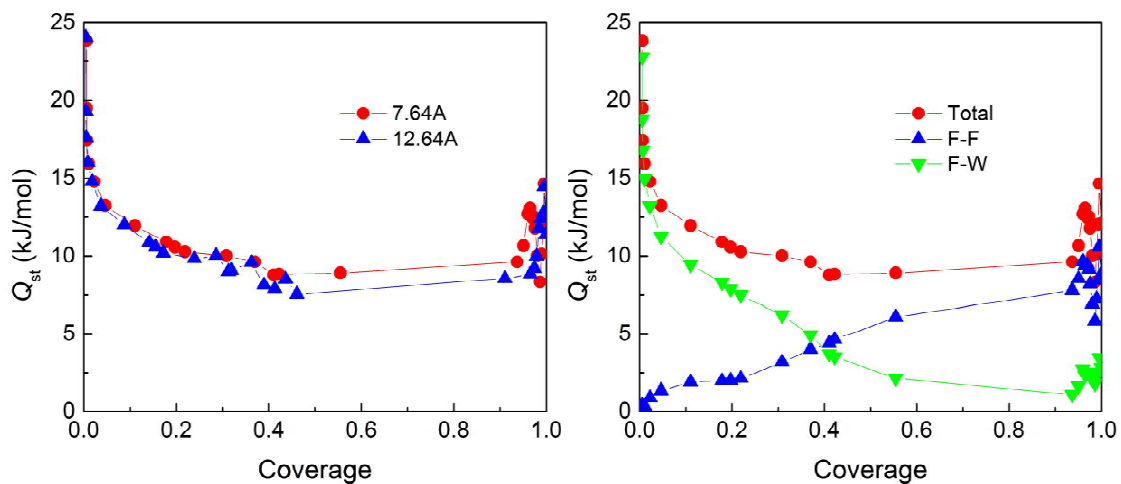

**Figure S3:** Isosteric heat of adsorption of CMK-1 models for 7.64A and 12.64A pore width (left). Total, Fluid-Fluid and Fluid-Wall contribution to 7.64A pore width (right)

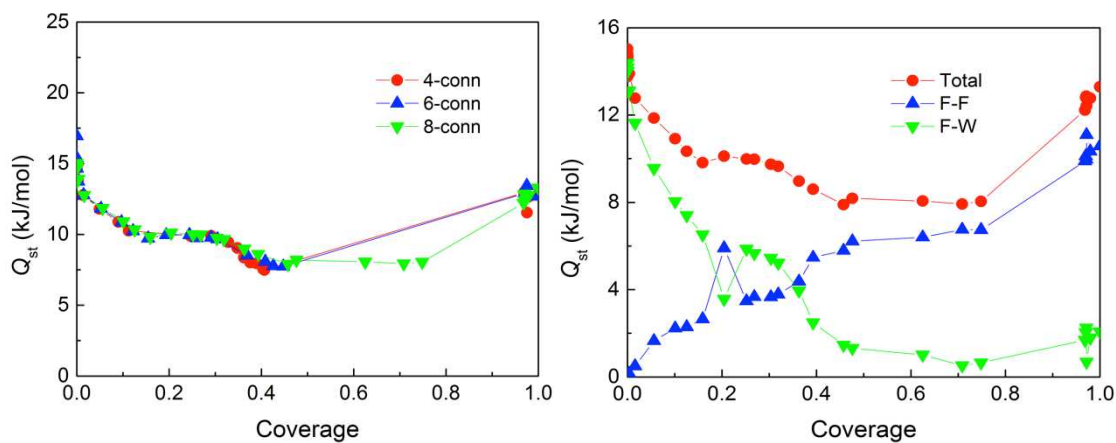

**Figure S4:** Isosteric heat of adsorption for the CMK-5 models with interconnections (left) and the total, fluid-fluid, fluid-wall contributions to the isosteric heat of CMK-5 model with 8 interconnections.

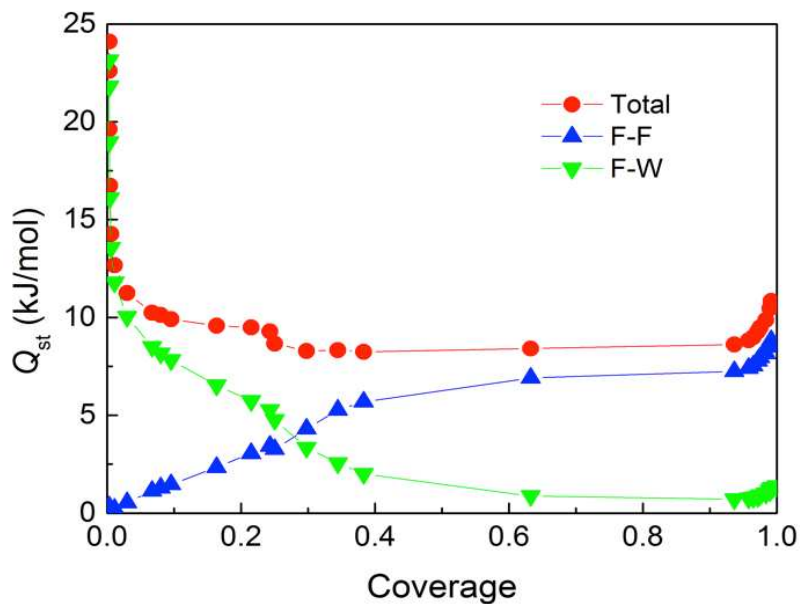

**Figure S5:** Isosteric heat of adsorption for the CMK-3 models with 8 interconnections. Total, fluid-fluid, fluid-wall contributions to the isosteric heat.

**Table S1:** Calculated framework density of CMK materials

| Materials     | $\rho_f$<br>(g/cm <sup>3</sup> ) |
|---------------|----------------------------------|
| CMK-1, 7.64A  | 1.108                            |
| CMK-1, 12.64A | 0.978                            |
| CMK-3, 14A-8c | 0.841                            |
| CMK-5, 14A-8c | 0.439                            |
